# Supplementary material for: A selective emissive chromogenic and fluorogenic seleno-coumarin probe for Cu2+ detection in aprotic media
Source: Royal Society of Chemistry journal article supplement (doi:10.1039/c7pp00036g), 2017-05-22
Supplement: c7pp00036g1.pdf [file c7pp00036g1.pdf]

## Electronic Supplementary Information (ESI)

### **A selective emissive chromogenic and fluorogenic seleno-coumarin probe for Cu<sup>2+</sup> detection in aprotic media.**

A. Cesar Gonçalves<sup>a,b</sup>, J. Luis Capelo<sup>b,c</sup>, C. Lodeiro<sup>b,c\*</sup>, A. A. Dos Santos<sup>a\*</sup>

<sup>a</sup>.Instituto de Química, Universidade de São Paulo, Av. Prof. Lineu Prestes, 748, CxP. 26077, São Paulo, 05508-000, Brazil.

<sup>b</sup>.BIOSCOPE Group, UCIBIO-REQUIMTE, Departamento de Química, Faculdade de Ciências e Tecnologia, Caparica, Universidade Nova de Lisboa, 2829-516 Portugal.

<sup>c</sup>.Proteomass Scientific Society, Rua dos Inventores, Madan Park, 2829-516 Caparica, Portugal.

#### **CONTENT:**

**Figure S1.** <sup>1</sup>H NMR spectrum of **7** (CDCl<sub>3</sub>; 400 MHz).

**Figure S2.** <sup>13</sup>C NMR spectrum of **7** (CDCl<sub>3</sub>; 101 MHz).

**Figure S3.** Full expanded MALDI-TOF-MS spectrum of **7**.

**Figure S4.** Isotopic model and MALDI-TOF-MS analysis of **7**.

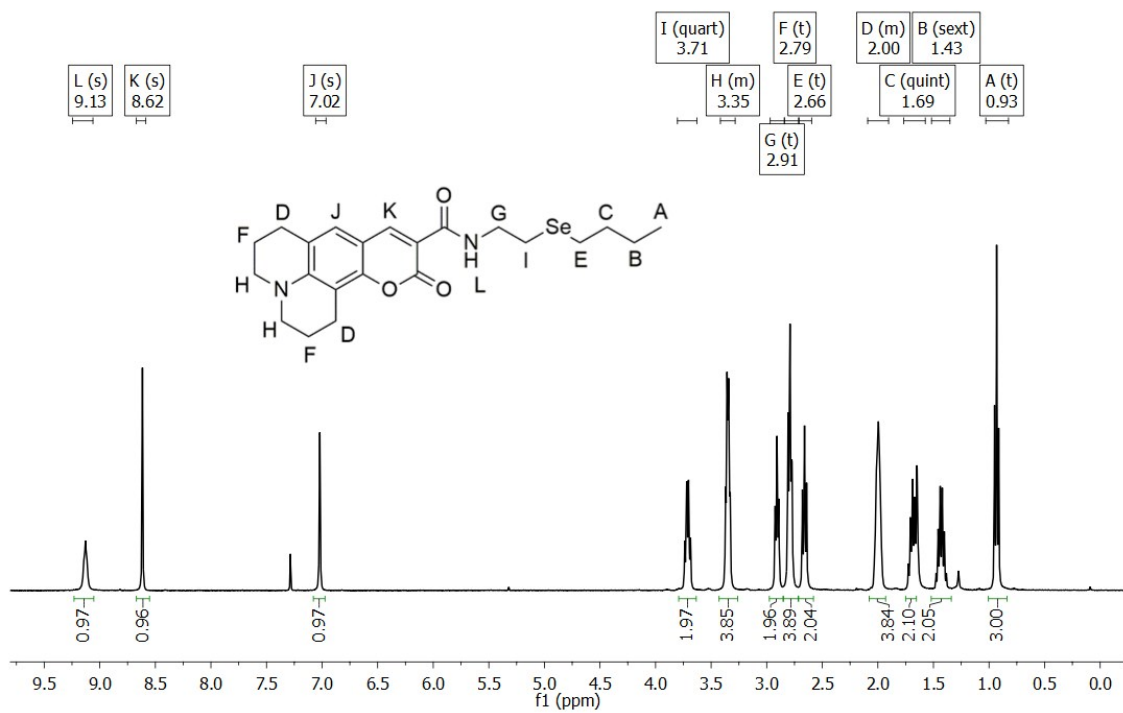

**Figure S1.**  $^1\text{H}$  NMR spectrum of **7** ( $\text{CDCl}_3$ ; 400 MHz).

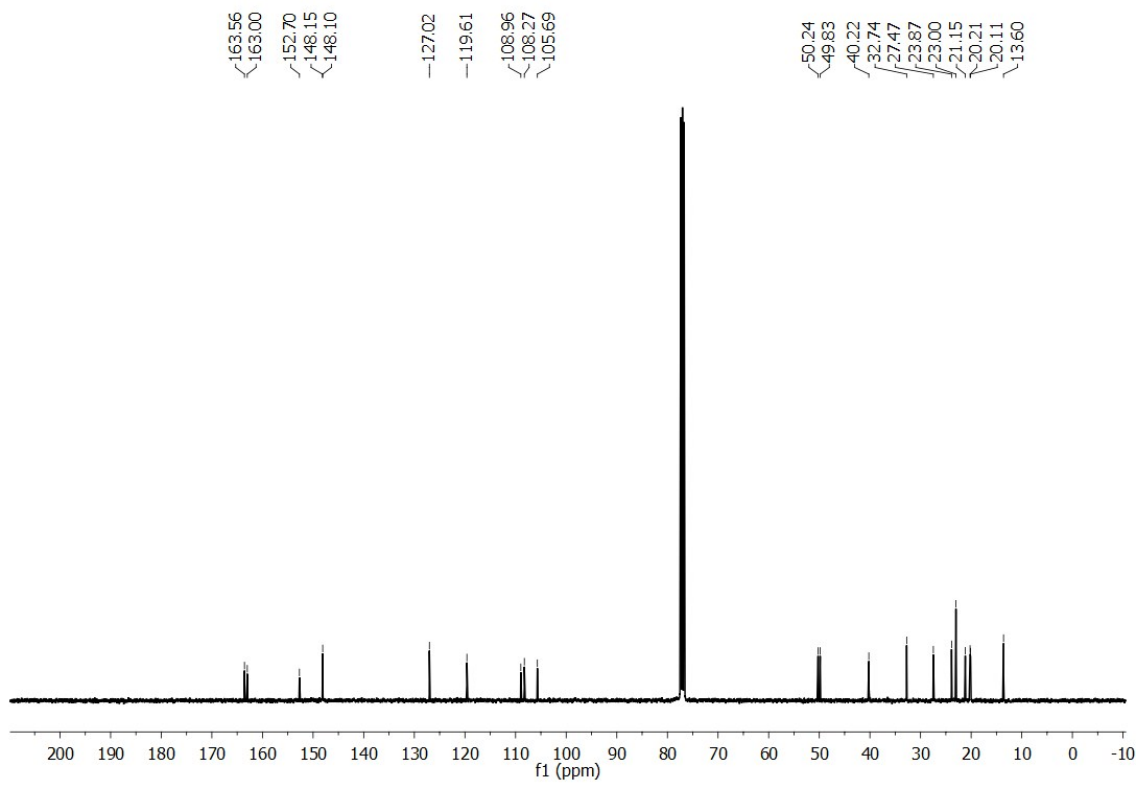

**Figure S2.** <sup>13</sup>C NMR spectrum of **7** (CDCl<sub>3</sub>; 101 MHz).

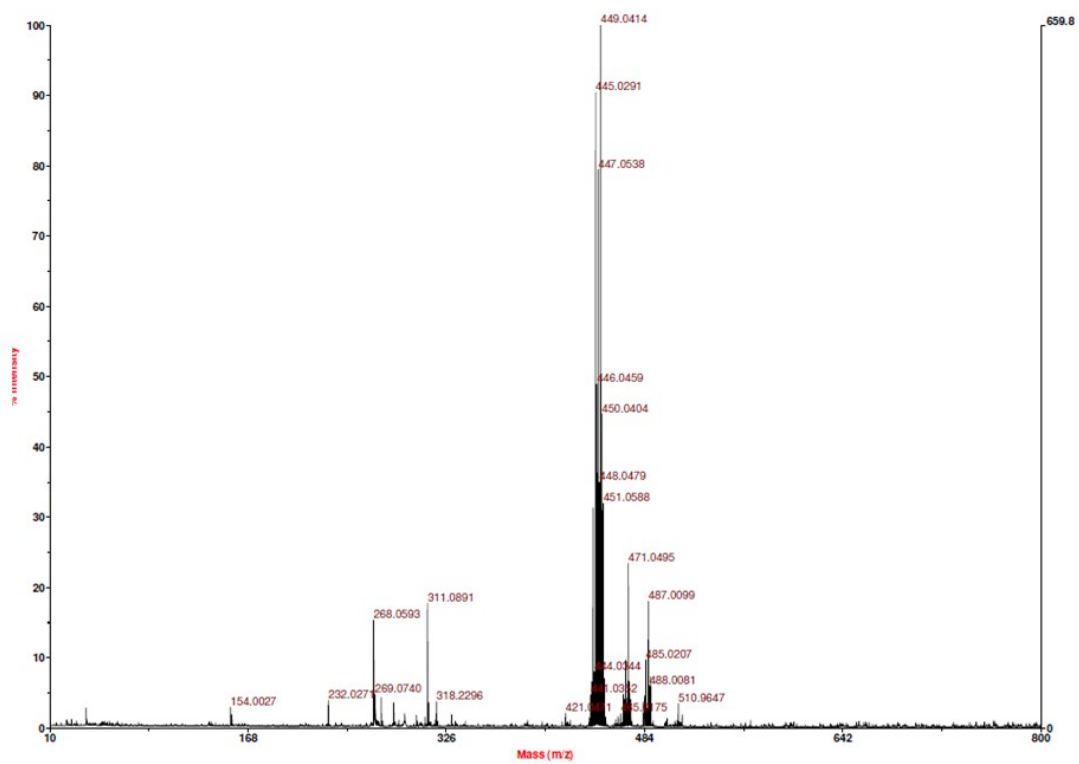

**Figure S3.** Full expanded MALDI-TOF-MS spectrum of **7**.

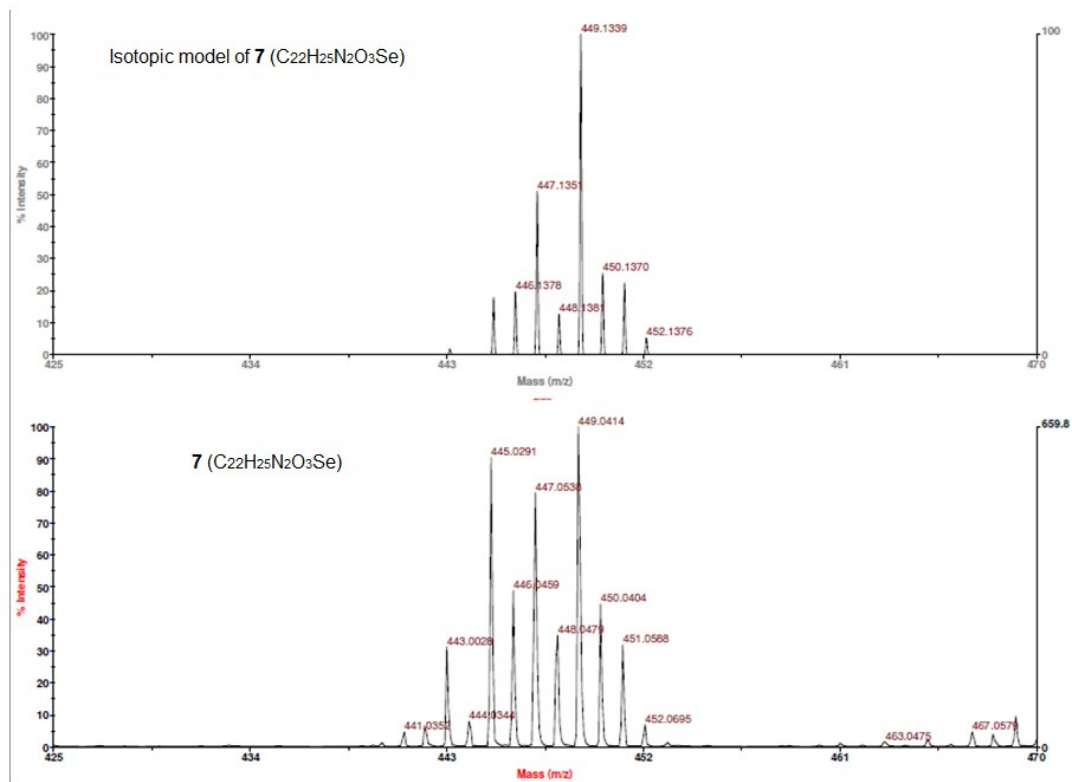

**Figure S4.** Isotopic model and MALDI-TOF-MS analysis of **7**.
